# Supplementary material for: Improved ethanol dehydration catalysis by the superior acid properties of Cs-impregnated silicotungstic acid supported on silica
Source: Royal Society of Chemistry journal article supplement (doi:10.1039/d1cy00143d), 2021-01-01
Supplement: d1cy00143d1.pdf [file d1cy00143d1.pdf]

## Electronic Supplementary Information (ESI)

# Improved ethanol dehydration catalysis by superior acid properties of Cs-impregnated silicotungstic acid supported on silica

Robin Himmelmann,<sup>[a]</sup> Elias Klemm,<sup>[a]</sup> and Michael Dybala<sup>[a]\*</sup>

[a] Institute of Technical Chemistry, University of Stuttgart, Pfaffenwaldring 55, 70569 Stuttgart, Germany

\*Corresponding author, E-mail: michael.dybala@itc.uni-stuttgart.de

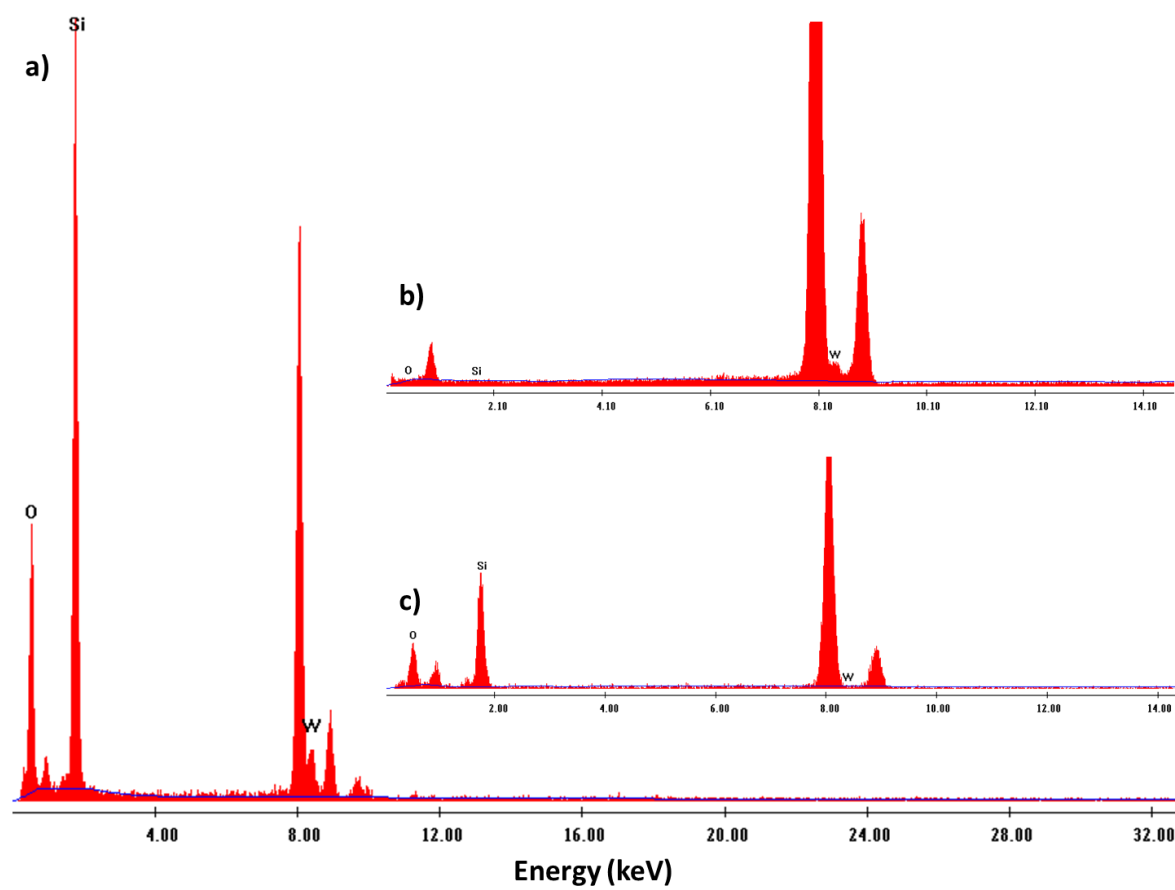

**Figure S1:** EDX spectra recorder for the STA-36 catalyst (a), the bulk H<sub>4</sub>SiW<sub>12</sub>O<sub>40</sub> crystallite (b) and for comparison pure A200 support (c).

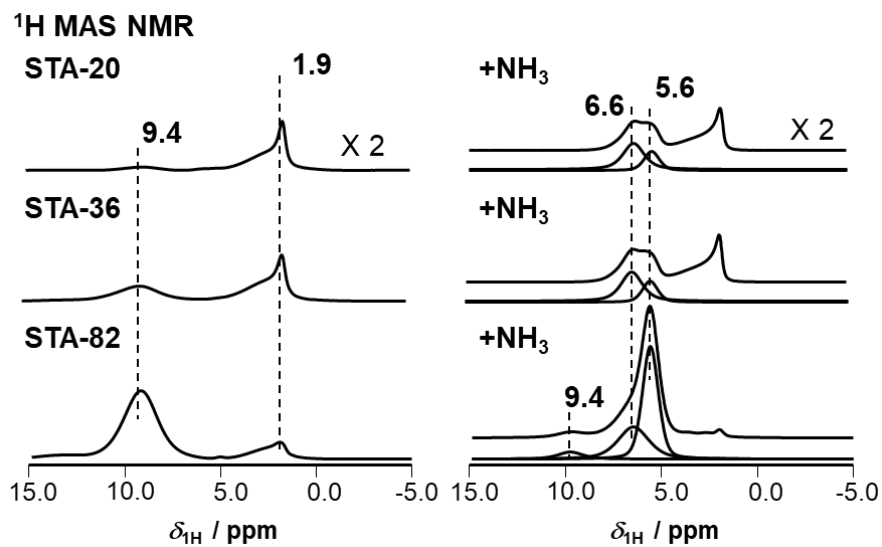

**Figure S2:**  $^1\text{H}$  MAS NMR spectra of STA-20, STA-36, and STA-80 (left) and after loading with  $\text{NH}_3$  (right). Shown are also the de-convoluted peaks of acid sites at  $\delta_{1\text{H}} = 5.6, 6.6,$  and  $9.4$  ppm, respectively. The spectra of STA-20 are magnified by factor 2 and not weight-corrected.

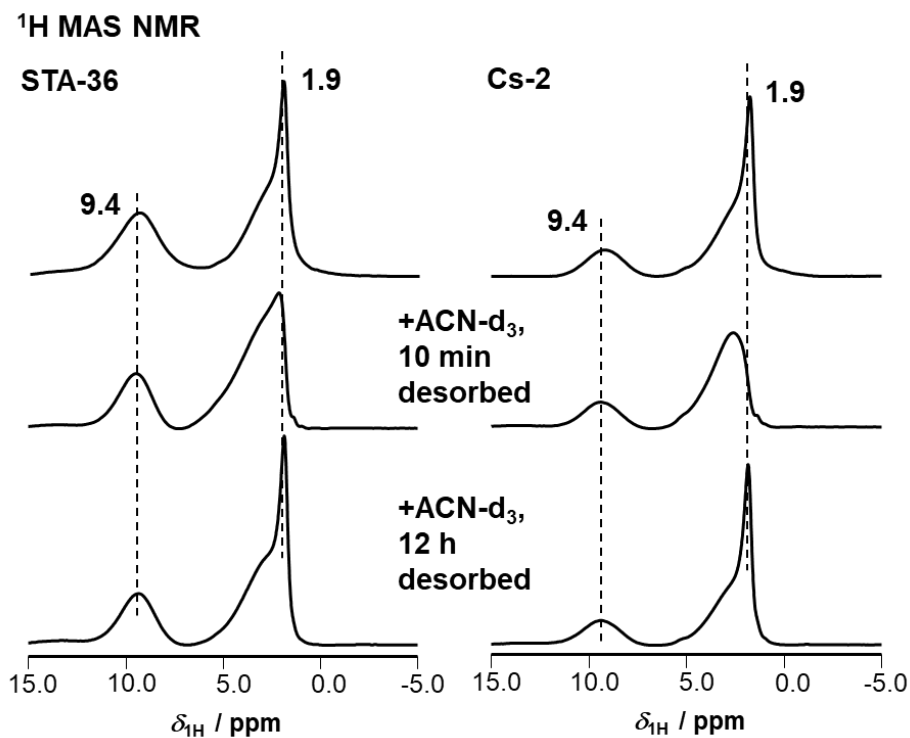

**Figure S3:** <sup>1</sup>H MAS NMR spectra of STA-36 (left) and Cs-2 (right). From top to bottom: activated material, spectra 10 min in vacuum after loading acetonitrile-d<sub>3</sub>, and after removing the physisorbed acetonitrile-d<sub>3</sub> in vacuum overnight. The acid site peaks at 9.4 ppm remain untouched by the weak base, whereas peaks of Si-OH groups at 1.9 ppm show a typical low-field shift upon coverage with acetonitrile-d<sub>3</sub> after 10 min, verifying complete loading.

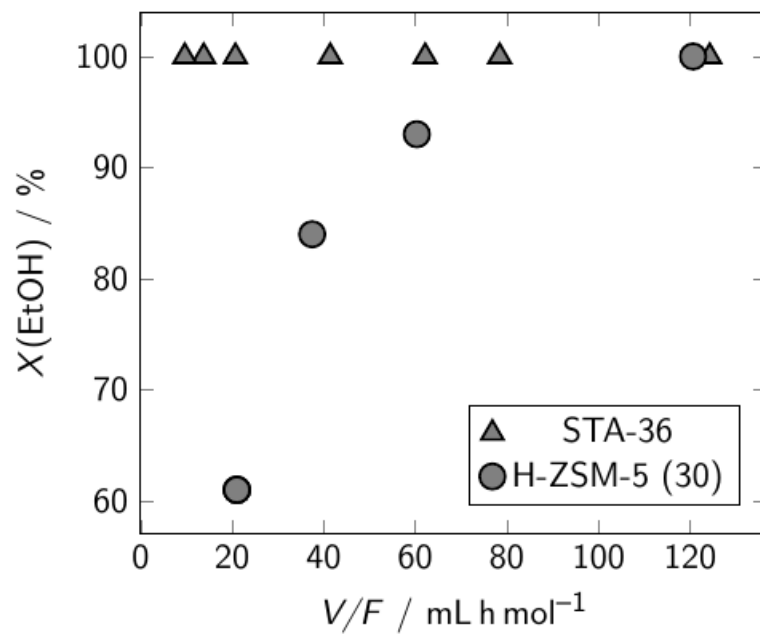

**Figure S4:** Volume of catalyst  $V$  used to obtain the respective ethanol conversion of a feed  $F$  of one mol/h compared to zeolite catalyst ZSM-5 with a Si/Al ratio of 30.

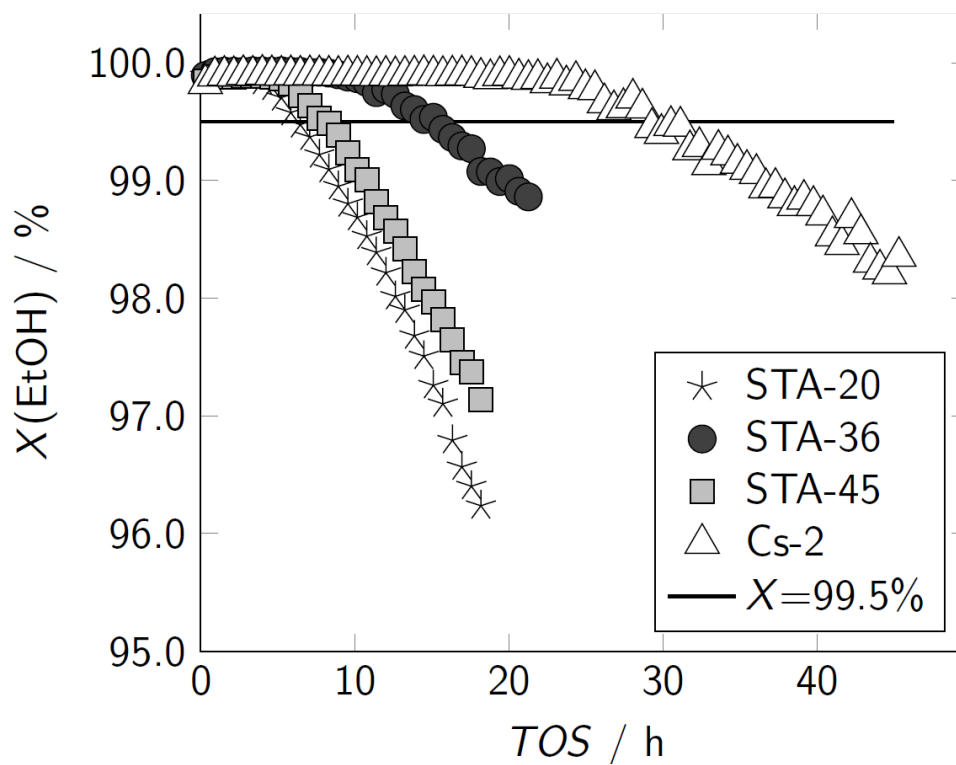

**Figure S5:** Conversion-time plots of heteropoly acid (HPA) catalysts before and after CsOH-impregnation showing the longest lifetime for an intermediate STA-loading of 36 wt% (STA-36). For comparison, only the post-modified catalysts with longest lifetime (Cs-2) is plotted.
